# Supplementary material
Source: ML conference proceedings conference paper supplement (https://openaccess.thecvf.com/content/cvpr_2016/html/Baque_Principled_Parallel_Mean-Field_2016_CVPR_paper.html)
Supplement: Supplementary file 4 [file samples_dtf.pdf › supplementary/samples_dtf.pdf]

noisy

gt

SWEEP

FULL-PARALLEL

ADHOC

OURS-FIXED

OURS-ADAPTIVE

OURS-MOMENTUM

OURS-ADAM

會 會 會 會 會 會 會 會 會

李 李 李 李 李 李 李 李 李

會 會 會 會 會 會 會 會 會

烈 烈 烈 烈 烈 烈 烈 烈 烈

正 正 正 正 正 正 正 正 正

辰 辰 辰 辰 辰 辰 辰 辰 辰

李 李 李 李 李 李 李 李 李

永基 永基 永基 永基 永基 永基 永基 永基 永基

鍾 鍾 鍾 鍾 鍾 鍾 鍾 鍾 鍾

會 會 會 會 會 會 會 會 會

noisy

SWEEP

FULL-PARALLEL

ADHOC

OURS-FIXED

OURS-ADAPTIVE

OURS-MOMENTUM

OURS-ADAM

gt

noisy

gt

SWEEP

FULL-PARALLEL

ADHOC

OURS-FIXED

OURS-ADAPTIVE

OURS-MOMENTUM

OURS-ADAM

|   |   |   |   |   |   |   |   |   |
|---|---|---|---|---|---|---|---|---|
| 李 | 李 | 李 | 李 | 李 | 李 | 李 | 李 | 李 |
| 柱 | 柱 | 柱 | 柱 | 柱 | 柱 | 柱 | 柱 | 柱 |
| 吉 | 吉 | 吉 | 吉 | 吉 | 吉 | 吉 | 吉 | 吉 |
| 李 | 李 | 李 | 李 | 李 | 李 | 李 | 李 | 李 |
| 玟 | 玟 | 玟 | 玟 | 玟 | 玟 | 玟 | 玟 | 玟 |
| 载 | 载 | 载 | 载 | 载 | 载 | 载 | 载 | 载 |
| 徐 | 徐 | 徐 | 徐 | 徐 | 徐 | 徐 | 徐 | 徐 |
| 天 | 天 | 天 | 天 | 天 | 天 | 天 | 天 | 天 |
| 意 | 意 | 意 | 意 | 意 | 意 | 意 | 意 | 意 |
| 翼 | 翼 | 翼 | 翼 | 翼 | 翼 | 翼 | 翼 | 翼 |
| 照 | 照 | 照 | 照 | 照 | 照 | 照 | 照 | 照 |
| 身 | 身 | 身 | 身 | 身 | 身 | 身 | 身 | 身 |

noisy

SWEEP

FULL-PARALLEL

ADHOC

OURS-FIXED

OURS-ADAPTIVE

OURS-MOMENTUM

OURS-ADAM

gt
