# Supplementary material
Source: ML conference proceedings conference paper supplement (https://openaccess.thecvf.com/content/cvpr_2016/html/Baque_Principled_Parallel_Mean-Field_2016_CVPR_paper.html)
Supplement: Supplementary file 6 [file supplementary_evalution.pdf › supplementary/supplementary_evalution.pdf]

# Supplementary evaluation for the submission “Principled Parallel Mean-Field Inference for Discrete Markov Random Fields”

April 5, 2016

## 1 Details regarding the datasets

| name          | variables | factors | degree | states |
|---------------|-----------|---------|--------|--------|
| DBN           | 920       | 54160   | 2      | 2      |
| GRID          | 1600      | 6400    | 2      | 2      |
| SEG           | 230       | 622     | 2      | 2      |
| char.inpaint. | 9146      | 131072  | 2      | 2      |
| peop.detect.  | 20000     | 98300   | 50     | 2      |
| sem.segm.     | 65636     | dense   | 2+     | 21     |

Table 1: Details of the considered graphical models. Average values over all instances.

## 2 Evaluation in fully sequential setting

For completeness, we evaluated our algorithms on benchmark datasets on a fully sequential setting. The figure below illustrates our results for the grid GRID and segmentation SEG datasets. For the others, results are similar.

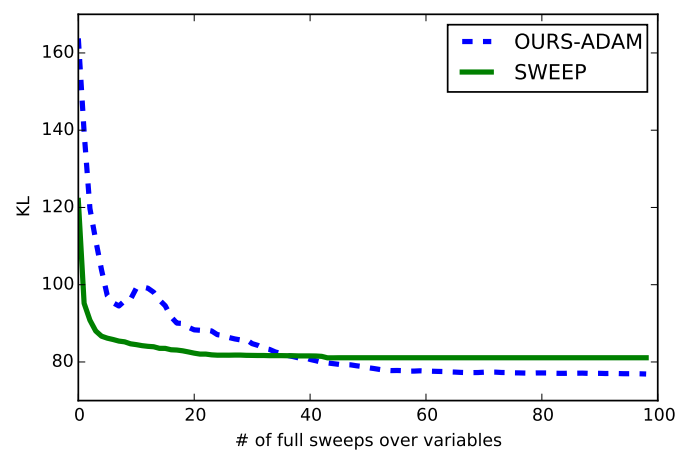

Figure 1: Convergence in sequential settings. SEG dataset.

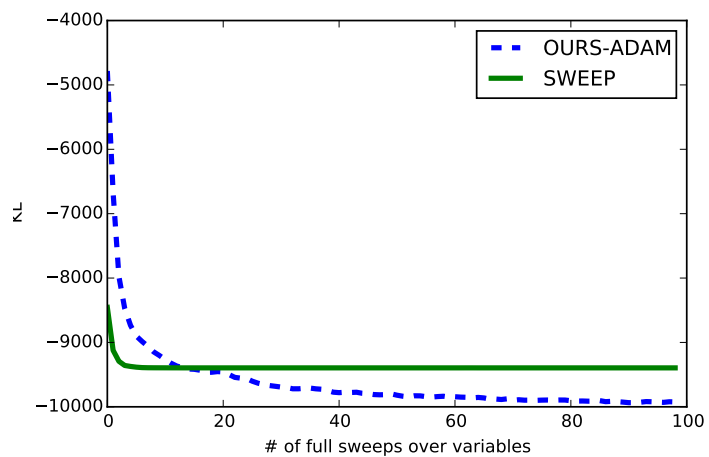

Figure 2: Convergence in sequential settings. GRID dataset.
