# Supplementary material
Source: ML conference proceedings conference paper supplement (https://openaccess.thecvf.com/content/cvpr_2016/html/Baque_Principled_Parallel_Mean-Field_2016_CVPR_paper.html)

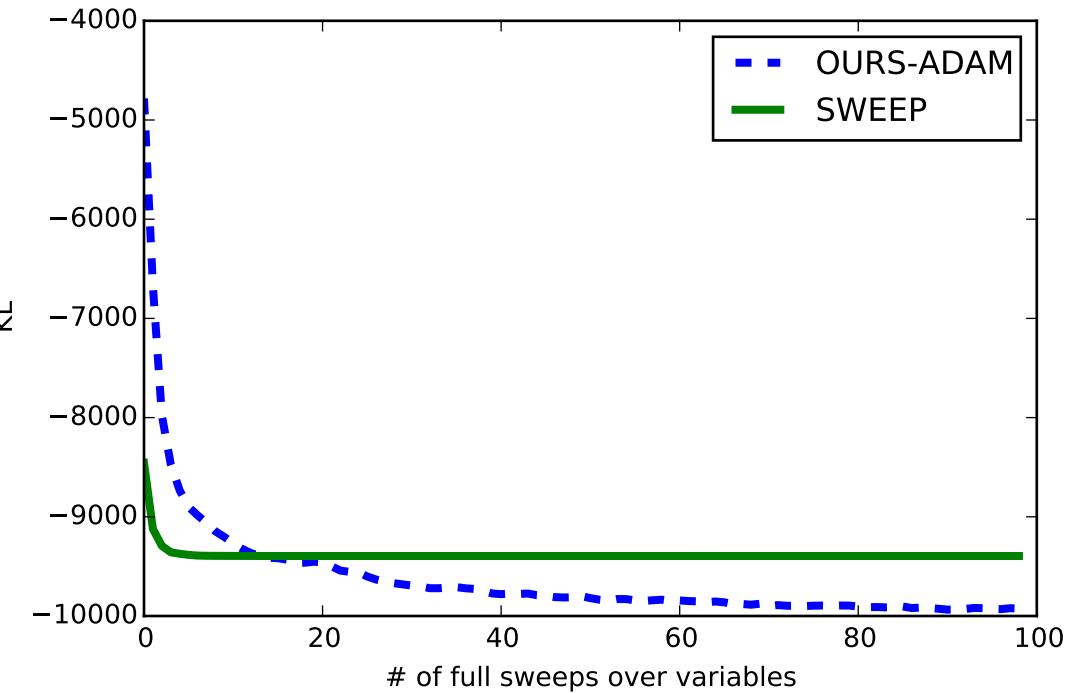

Supplement: Supplementary file 2 [file sequential_grid.pdf › supplementary/images/sequential_grid.pdf]

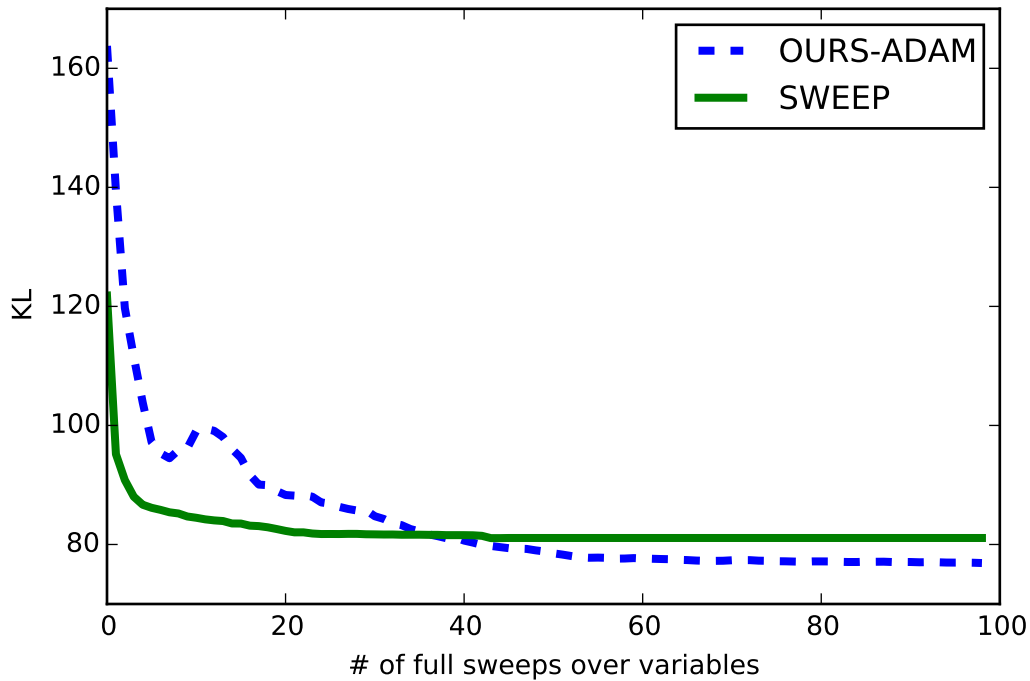

Supplement: Supplementary file 3 [file sequential_seg.pdf › supplementary/images/sequential_seg.pdf]

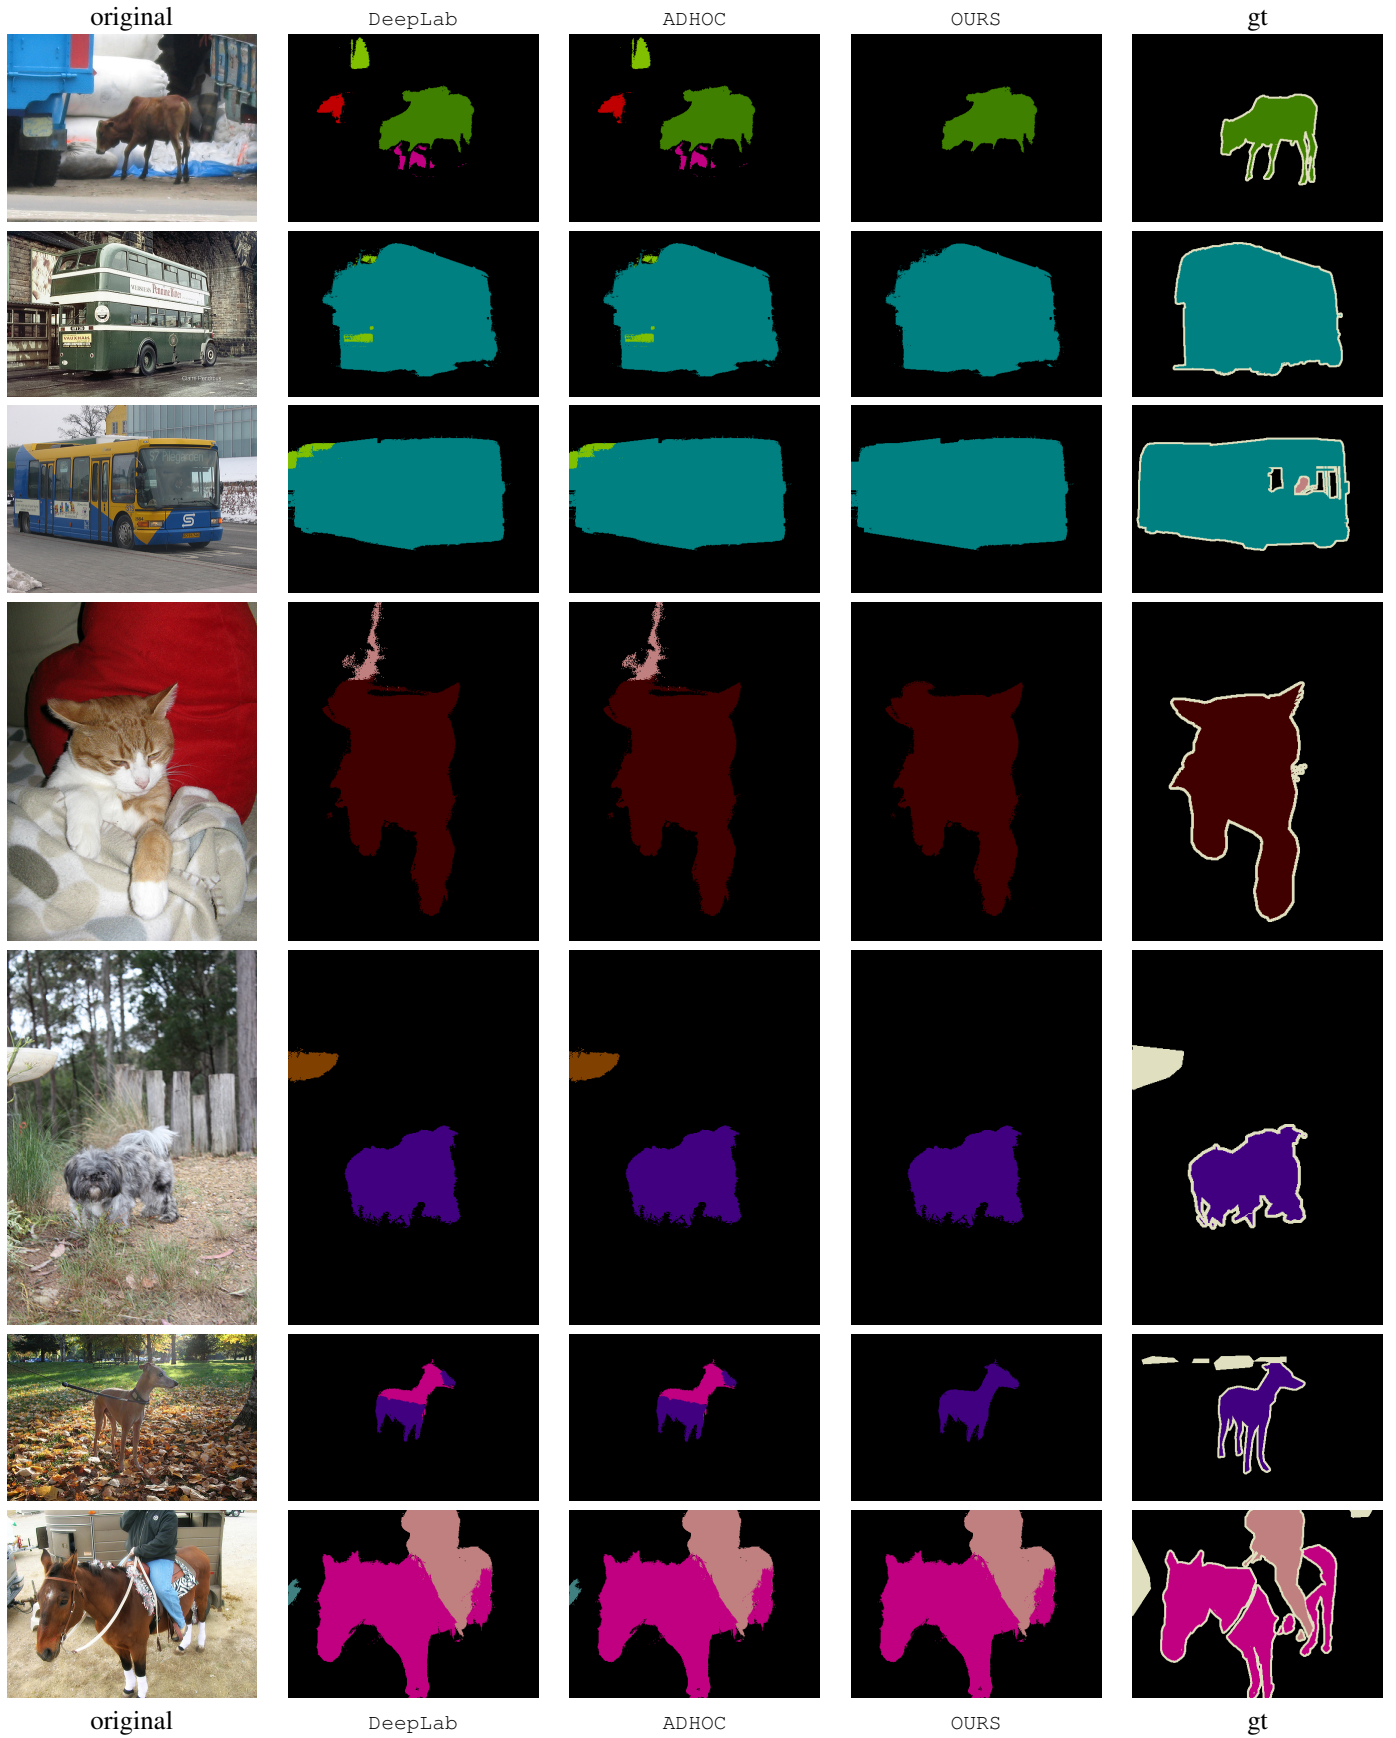

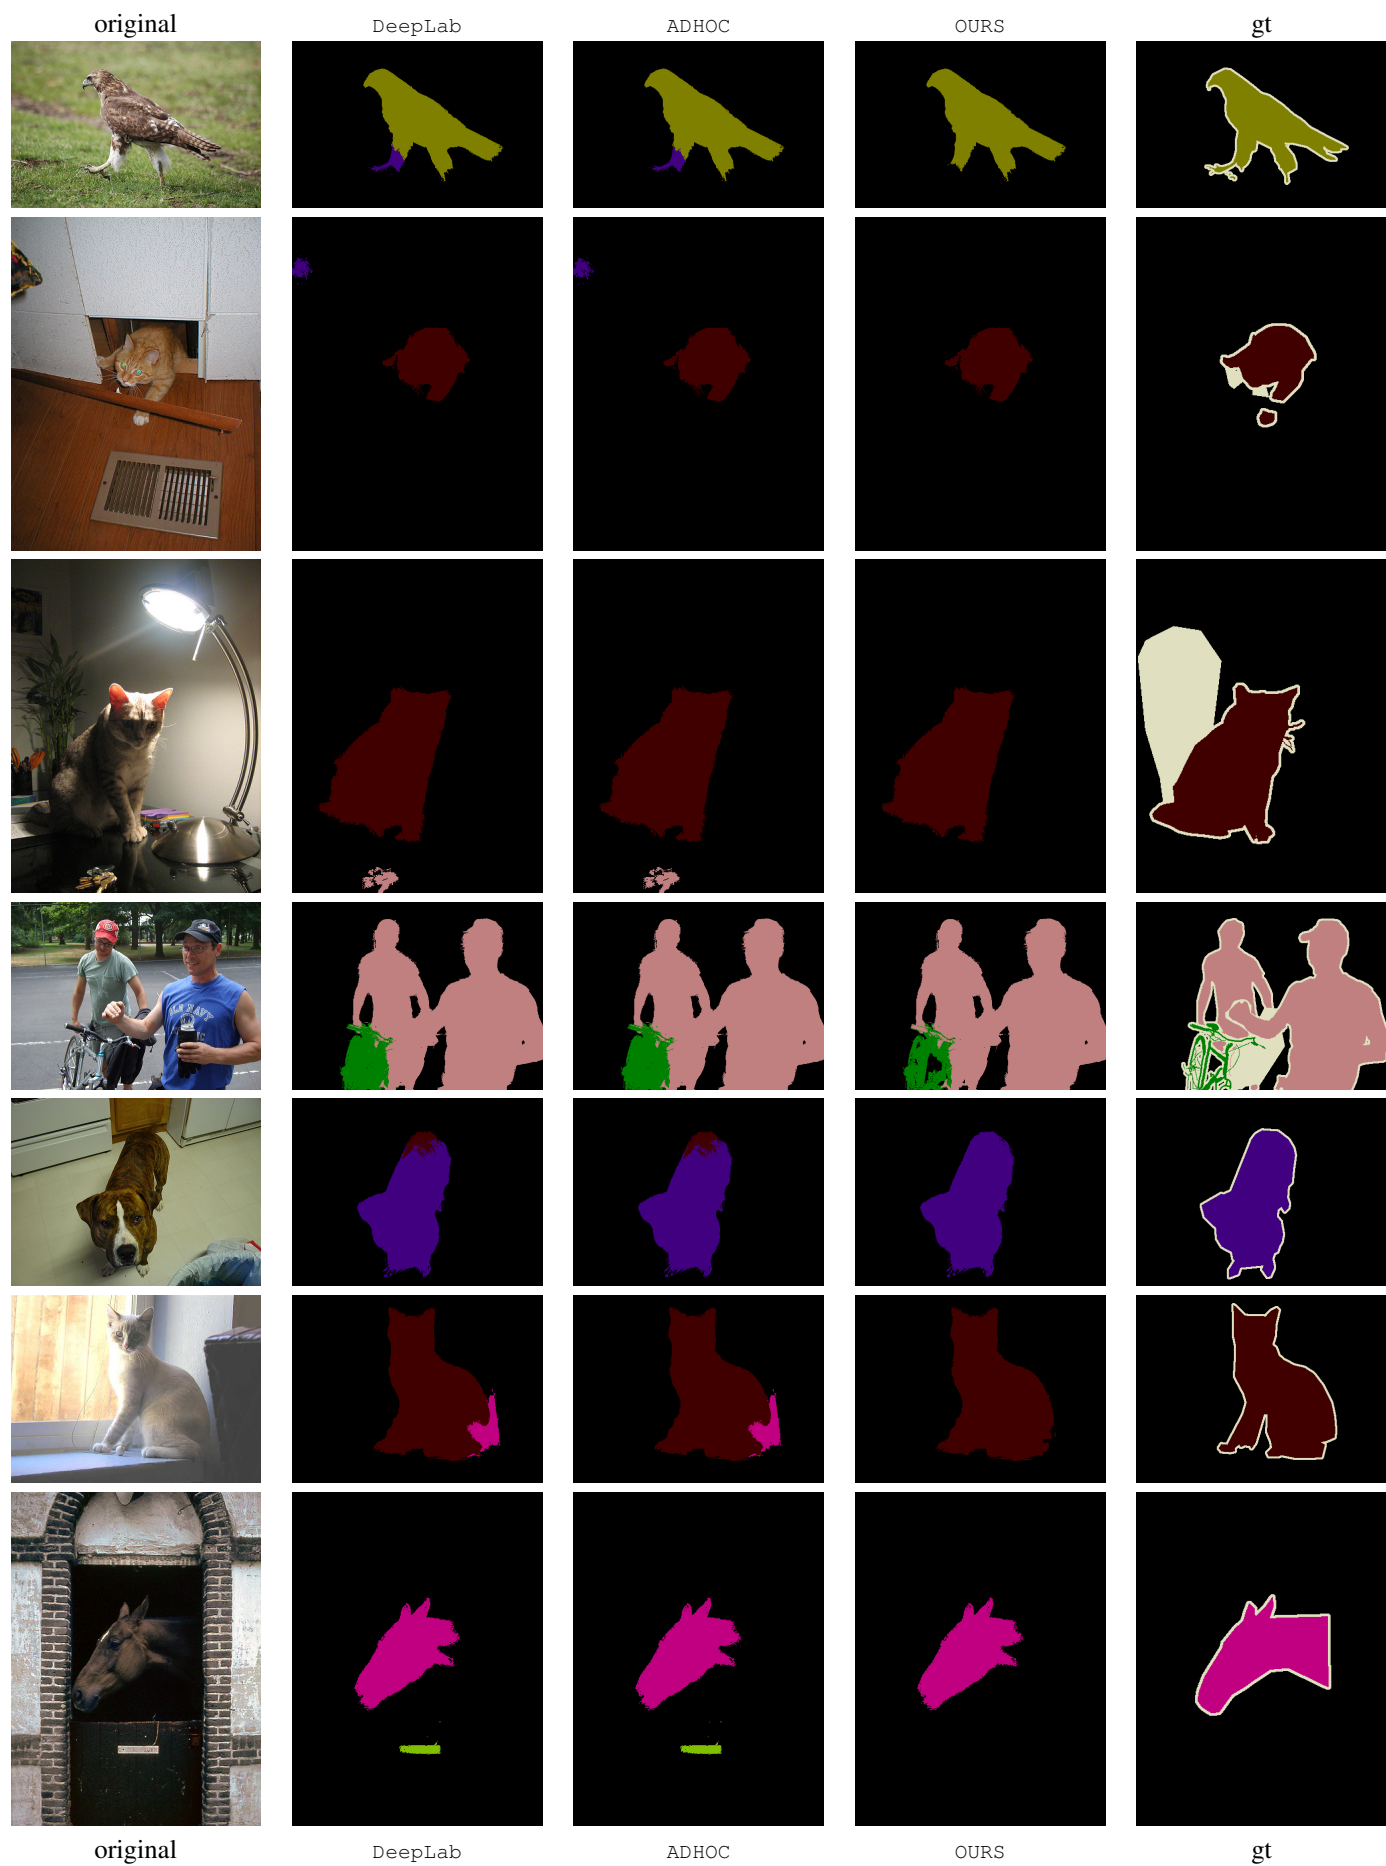

original

DeepLab

ADHOC

OURS

gt

Supplement: Supplementary file 5 [file samples_voc.pdf › supplementary/samples_voc.pdf]
